# Supplementary material for: BCR-Induced Ca2+ Signals Dynamically Tune Survival, Metabolic Reprogramming, and Proliferation of Naive B Cells
Source: PubMed Central journal article supplement — Cell Rep. Author manuscript; Available in PMC 2020 Jun 18. (PMC7301411; doi:10.1016/j.celrep.2020.03.038), 2020-04-14
Supplement: NIHMS1584935-supplement-1.pdf [file NIHMS1584935-supplement-1.pdf]

**Cell Reports, Volume 31**

**Supplemental Information**

**BCR-Induced Ca<sup>2+</sup> Signals Dynamically  
Tune Survival, Metabolic Reprogramming,  
and Proliferation of Naive B Cells**

**Corbett T. Berry, Xiaohong Liu, Arpita Myles, Satabdi Nandi, Youhai H. Chen, Uri Hershberg, Igor E. Brodsky, Michael P. Cancro, Christopher J. Lengner, Michael J. May, and Bruce D. Freedman**

**Supplemental Table 1: Oligonucleotides**

| <b>Gene Name</b> | <b>Forward</b>            | <b>Reverse</b>            |
|------------------|---------------------------|---------------------------|
| <i>B2m</i>       | CGGCCTGTATGCTATCCAGA      | GGGTGAATTCAGTGTGAGCC      |
| <i>Bad</i>       | GAGGAGGAGCTTAGCCCTTT      | AGGAACCCTCAAACATCATCG     |
| <i>Bak1</i>      | CTCTCATCGGAGATGATATTAACCG | AGTATGATATCAGCCAAAAAGCAGG |
| <i>Bax</i>       | GGAGATGAACTGGACAGCAATATGG | GTTTGCTAGCAAAGTAGAAGAGGGC |
| <i>Bbc3</i>      | GTGTGGAGGAGGAGGAGTG       | TCGATGCTGCTCTTCTTGTC      |
| <i>Bcl2</i>      | CAACACAAACCCCAAGTCCT      | GTTGAACTCGTCTCCGATCC      |
| <i>Bcl2l1</i>    | GGCCTTTTTCTCCTTTGGCG      | GATCCACAAAAGTGTCCCAGC     |
| <i>Bcl2l11</i>   | TGAGTACCTGAACCGGCATCT     | GCATCCAGCCTCCGTTAT        |
| <i>Bcl2la1</i>   | TTGCCTTTGGGGGTGTTCTC      | CCAACCTCCATTCTGCCGTA      |
| <i>Bid</i>       | AGACGAGCTGCAGACAGATG      | GGTCCATCTCATCGCCTATT      |
| <i>Ccne1</i>     | GTTCCAAGCCCAAGTCCTGA      | TTGCAAAAACACGGCCACAT      |
| <i>E2f3a</i>     | CTACGAACCCTTCCACCACG      | TTCGCTTTGCCGGTGGG         |
| <i>Irf4</i>      | CTTCAAGGCTTGGGCATTGTT     | TGGCCATCTGTGTGTCATCC      |
| <i>Mcl1</i>      | TGTAAGGACGAAACGGGACT      | AAAGCCAGCAGCACATTTCT      |
| <i>Myc</i>       | AGCTGTTTGAAGGCTGGATT      | AATAGGGCTGTACGGAGTCG      |
| <i>Nfkb2</i>     | CAGAAACTTCAGAGGCAGCGTC    | GCAAATAAACTTCGTCTCCACCG   |
| <i>Nfkb1a</i>    | CAGCTGACCCTGGAAAATCT      | ATAGGGCAGCTCATCCTCTGT     |
| <i>Noxa</i>      | GAGTGCACCGGACATAACTG      | CTCGTCCTTCAAGTCTGCTG      |
| <i>Rel</i>       | TGACAACCGTGCCCCAATA       | TTGGCGGTGTACATCAGCTT      |
| <i>Ubc</i>       | GCCCAGTGTTACCACCAAGA      | CCCATCACACCCAAGAACA       |
| CpG (ODN1826)    | TCCATGACGTTCTGACGTT       |                           |

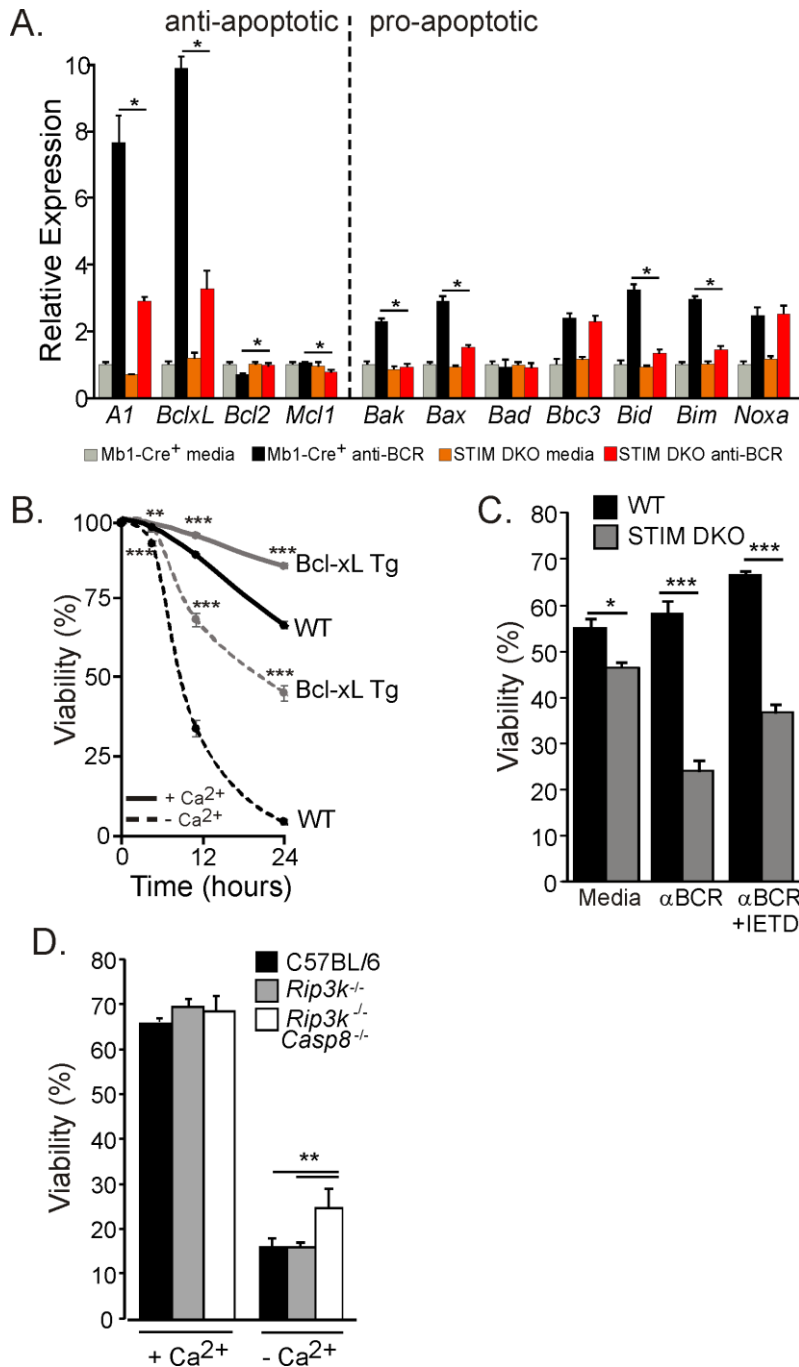

**Supplemental Figure 1: BCR-induced Ca<sup>2+</sup> signals regulate intrinsic but not extrinsic apoptosis.** (A) CD23<sup>+</sup> B cells from Mb1-cre and STIM DKO mice cultured in complete media in the absence or presence of anti-BCR for 6 hours before RNA isolation. mRNA expression of selected Bcl-2 family genes (mean ± 95% confidence interval based on triplicate measurements, \*statistically significant). (B) CD23<sup>+</sup> B cells from WT and Bcl-xL Transgenic (Tg) mice were stimulated with anti-BCR in control and Ca<sup>2+</sup> free (+ 0.5 mM EGTA) media for 24 hours. Percentage of live/dead dye-excluding cells (mean ± SD) from triplicate wells at indicated timepoints after anti-BCR stimulation. (C) Cell viability (mean ± SD of triplicate wells) after 20 hours of stimulation in the absence and presence of caspase 8 selective inhibitor, z-IETD-fmk (100μM). (D) CD23<sup>+</sup> B cells from C57BL/6, *Rip3k*<sup>-/-</sup>, and *Rip3k*<sup>-/-</sup>*Casp8*<sup>-/-</sup> mice were stimulated for 16 hours in normal or EGTA (0.5 mM) buffered media and viability calculated as the fraction of live/dead dye-excluding cells (mean ± SD from triplicate wells, n = 3-5 mice per group).

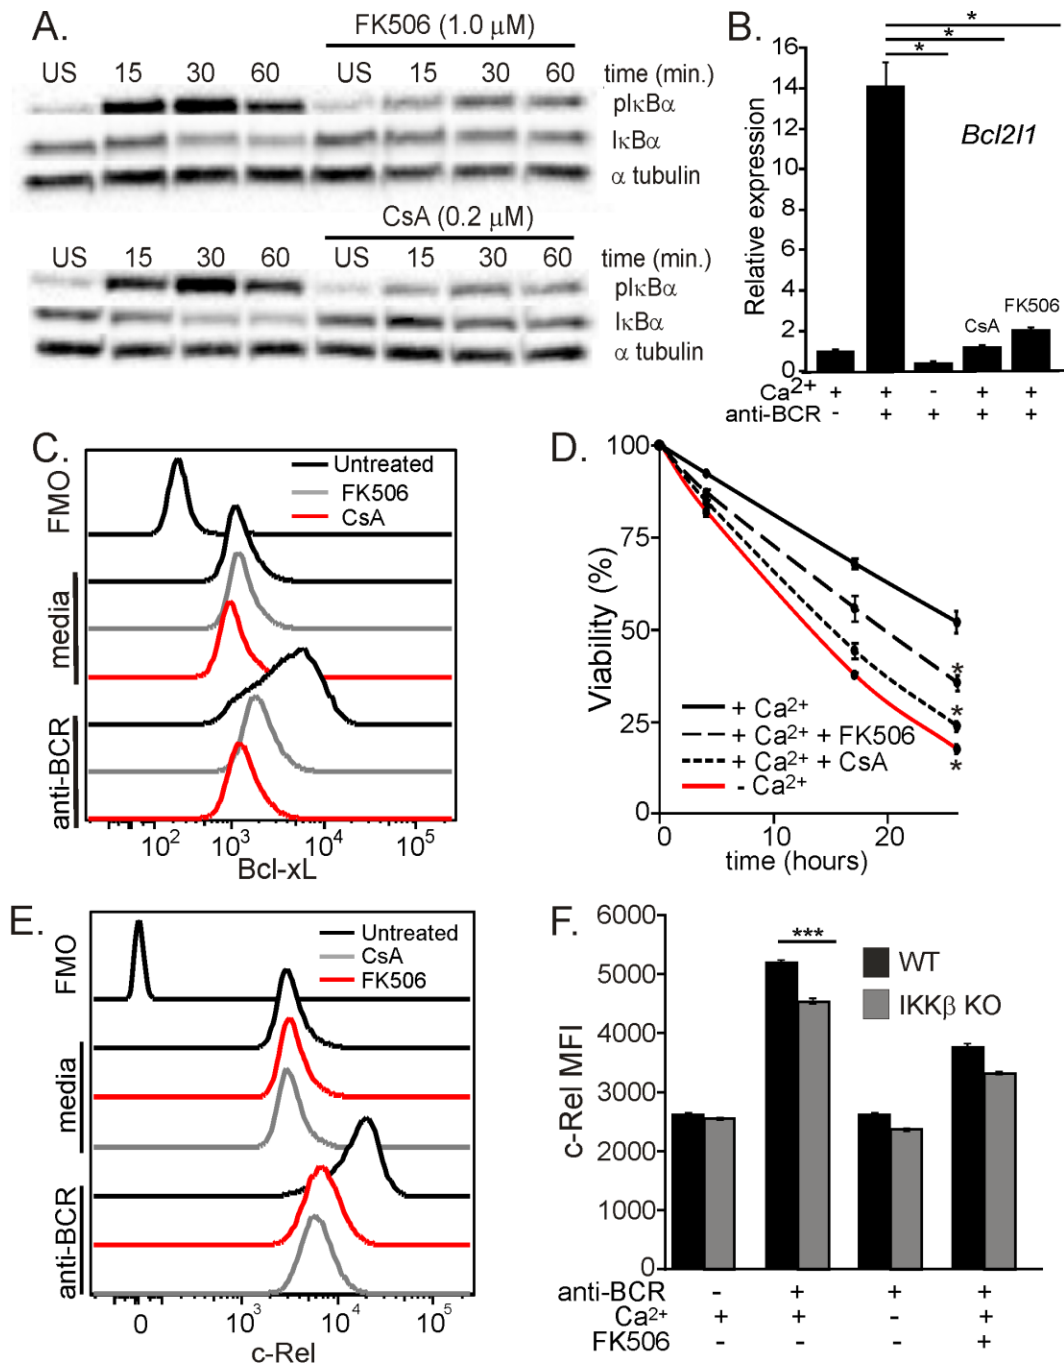

**Supplemental Figure 2: Calcineurin mediates Ca<sup>2+</sup> dependent c-Rel activation in mature B cells.** (A) Immunoblot of NF- $\kappa$ B activation in splenic CD23<sup>+</sup> B cells from anti-BCR stimulated WT mice for indicated times in the absence or presence of Calcineurin (Cn) inhibitors FK506 (1  $\mu$ M) or Cyclosporine A (CsA, 0.2  $\mu$ M). (B) *Bcl211* mRNA was measured in WT B cells after 3 hours of anti-BCR stimulation in the presence and absence of extracellular Ca<sup>2+</sup> and Cn inhibitors (mean  $\pm$  95% confidence interval, \*statistically significant). (C) Bcl-xL expression at 20 hours after anti-BCR stimulation in the presence or absence of Cn inhibitors. (D) B cell viability 24 hours after anti-BCR stimulation in the presence and absence of Cn inhibitors (mean percentage  $\pm$  SD) (E) c-Rel expression 20 hours after anti-BCR stimulation in the presence or absence of Cn inhibitors. (F) c-Rel expression (mean MFI  $\pm$  SD from triplicate wells) in CD23<sup>+</sup> B cells from *Ikk2<sup>fl/fl</sup> x Mb1cre-* (WT, black line) and *Ikk2<sup>fl/fl</sup> x Mb1cre+* (IKK $\beta$  KO, red line) mice cultured with anti-BCR for 6 hours in the presence and absence of CsA or FK506.

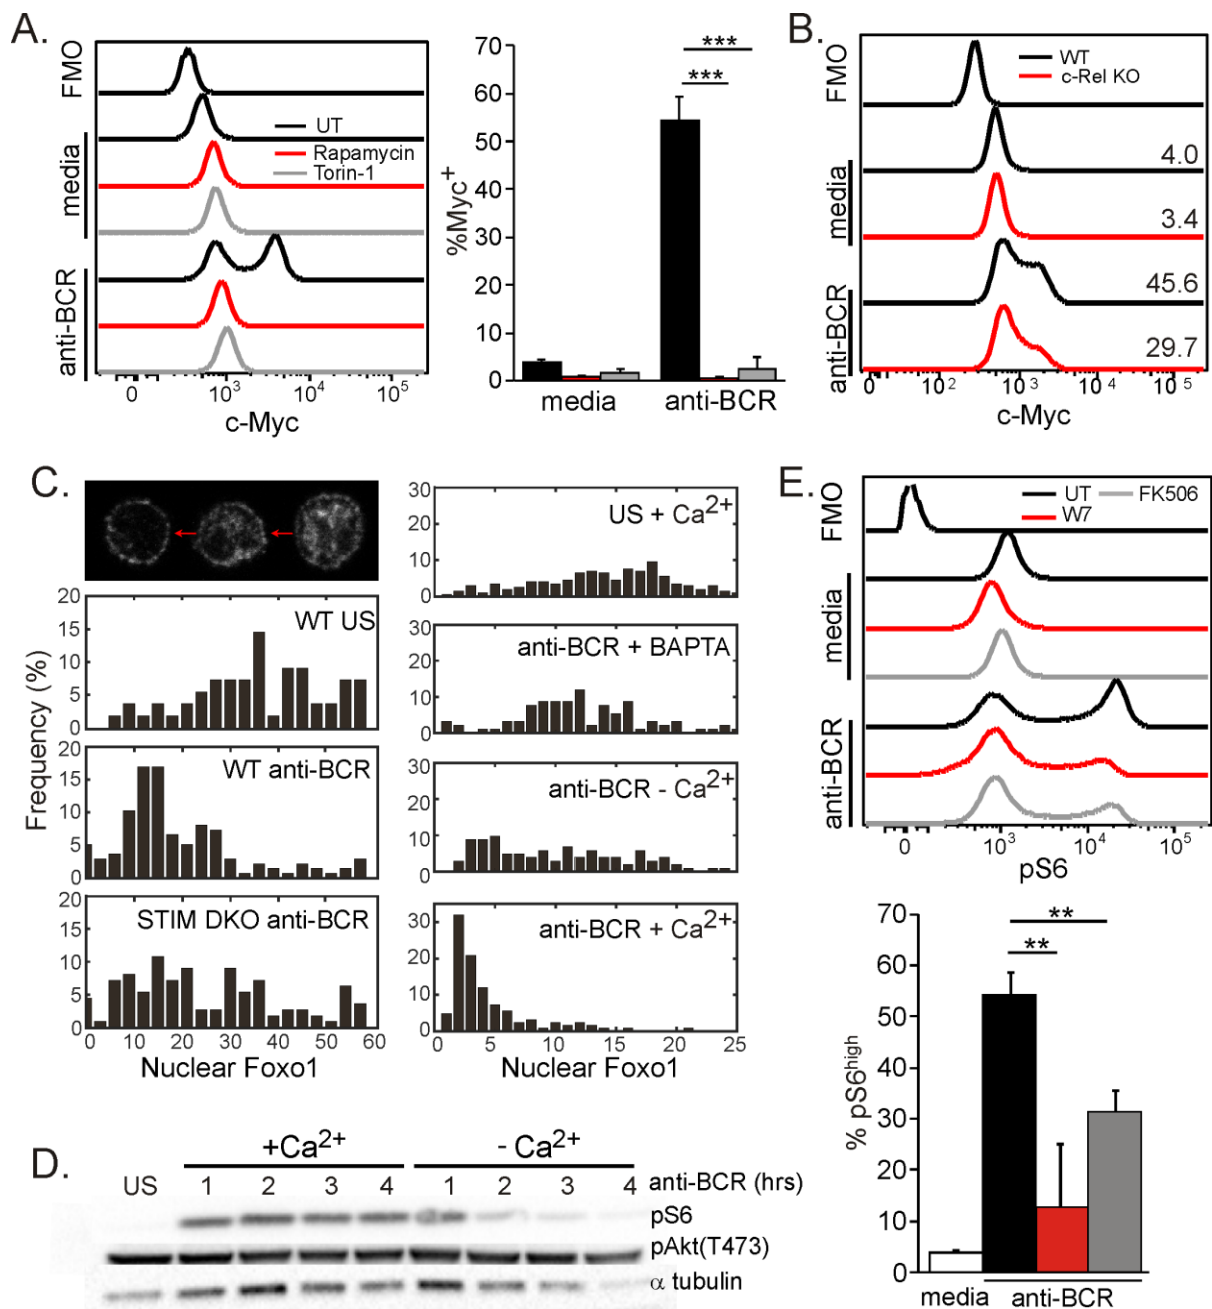

**Supplemental Figure 3: Ca<sup>2+</sup> regulated mechanisms controlling cell cycle entry and proliferation.** (A) Intracellular c-Myc levels in anti-BCR stimulated untreated (UT) WT CD23+ B cells and cells treated with rapamycin (25 nM) or Torin-1 (100 nM) for 4 hours (left). Proportion of cells expressing Myc (right, mean +/- S.D.). (B) Intracellular c-Myc in C57Bl/6 (WT) and c-Rel KO CD23+ B cells cultured in the absence (media) or presence of anti-BCR for 6 hours. The proportion of c-Myc<sup>+</sup> cells was determined using fluorescence minus one (FMO) staining (representative of 3 independent experiments). (C) Localization of Foxo1 following BCR engagement in WT and STIM DKO B cells treated as indicated. Each histogram represents >50 cells and is representative of 3 independent experiments. (D) Time course of Akt473 and S6 phosphorylation in CD23+ WT and STIM DKO B cells stimulated with anti-BCR in the absence and presence of extracellular Ca<sup>2+</sup>. Results are representative of at least 3 independent experiments. (E) Phospho-S6 levels 4 hours after anti-BCR stimulation in the presence and absence of the CaM inhibitor W7 (5 μM) or Cn inhibitor FK506 (1 μM) (top). Proportion of pS6 high B cells (bottom, mean +/- S.D. of triplicate measurements).

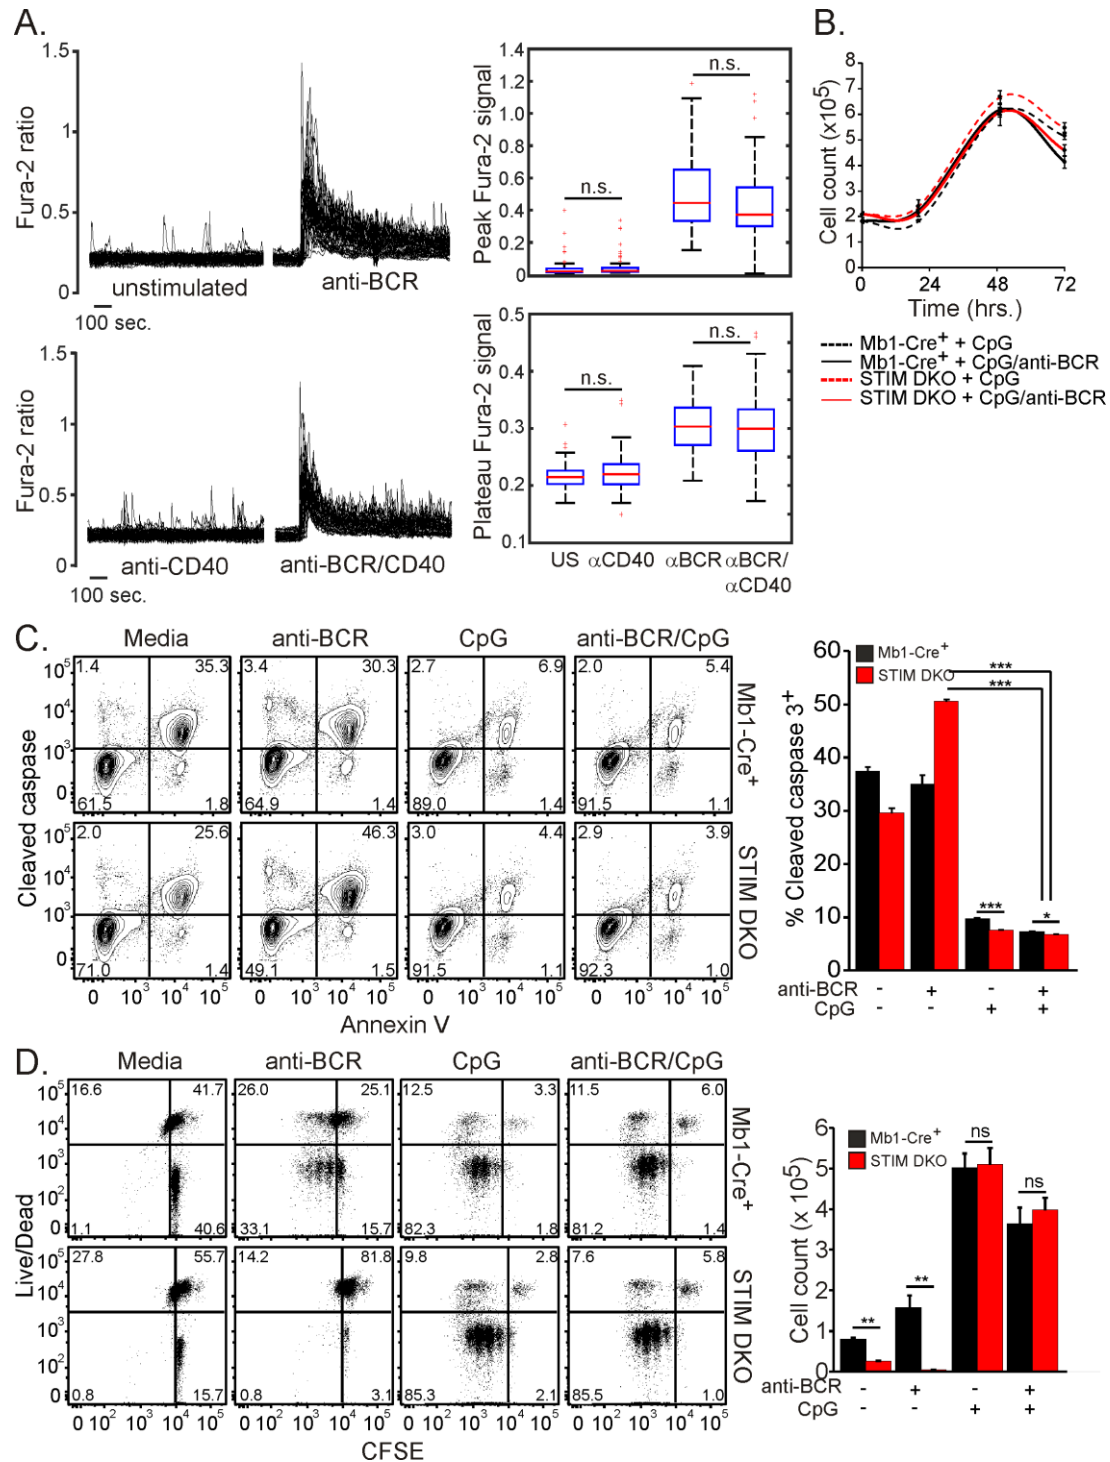

**Supplemental Figure 4: Mechanisms of CD40- and TLR9-dependent rescue of B cell survival and proliferation.** (A) Fura-2 ratiometric measurement of  $Ca^{2+}$  in B cells stimulated as indicated. Each line depicts the response of a single cell (left). Boxplots of initial peak and steady-state (plateau) fura-2 ratio for samples shown to the left (right, data are representative of 3 independent experiments with >50 cells). (B) Total cell counts (mean  $\pm$  S.D. of triplicate wells) following CpG  $\pm$  anti-BCR stimulation. (C) Intracellular cleaved caspase 3 in live and dead CpG or 24 hours after anti-BCR/CpG stimulation of WT and STIM DKO B cells (left). Percentage (mean  $\pm$  S.D., from triplicate wells) of cleaved caspase 3 positive cells (right). (D) CFSE dilution assay for CD23 $^{+}$  B cells from WT and STIM DKO mice stimulated as indicated for 72 hours (left) and total cell counts (mean  $\pm$  S.D. from triplicate wells) (right).
